# Supplementary material for: The Swine Erysipelas Vaccine SER-ME Effectively Protects Pigs against Challenge with the Erysipelothrix rhusiopathiae M203/I257 SpaA-Type Variant
Source: MDPI journal article supplement (doi:10.3390/vetsci9080382), 2022-07-26
Supplement: s1 [file s1]

## Supplementary Materials

**Table S1.** Adverse events following the vaccination.

| Group No. | Pig No. | Immunization            | The Primary Vaccination     |                              |                         |                           | The Booster Vaccination |            |       |            |
|-----------|---------|-------------------------|-----------------------------|------------------------------|-------------------------|---------------------------|-------------------------|------------|-------|------------|
|           |         |                         | Red patch<br>* <sub>1</sub> | Induration<br>* <sub>2</sub> | Fever<br>* <sub>3</sub> | Inactivity * <sub>4</sub> | Red Patch               | Induration | Fever | Inactivity |
| 1         | 1       | Vaccinated<br>(SER-ME)  | –                           | –                            | –                       | –                         | –                       | –          | –     | –          |
|           | 2       |                         | –                           | –                            | –                       | –                         | –                       | +          | –     | –          |
|           | 3       |                         | –                           | –                            | +                       | –                         | –                       | +          | –     | –          |
|           | 4       |                         | +                           | +                            | –                       | –                         | –                       | –          | –     | –          |
| 2         | 5       | Unvaccinated<br>control | Not applicable              |                              |                         |                           |                         |            |       |            |
|           | 6       |                         |                             |                              |                         |                           |                         |            |       |            |
|           | 7       |                         |                             |                              |                         |                           |                         |            |       |            |
|           | 8       |                         |                             |                              |                         |                           |                         |            |       |            |
| 3         | 9       | Vaccinated<br>(SER-ME)  | +                           | +                            | –                       | –                         | –                       | –          | –     | –          |
|           | 10      |                         | +                           | –                            | +                       | –                         | –                       | –          | –     | –          |
|           | 11      |                         | +                           | –                            | –                       | –                         | –                       | –          | –     | –          |
|           | 12      |                         | –                           | –                            | –                       | –                         | –                       | –          | –     | –          |
| 4         | 13      | Unvaccinated<br>control | Not applicable              |                              |                         |                           |                         |            |       |            |
|           | 14      |                         |                             |                              |                         |                           |                         |            |       |            |
|           | 15      |                         |                             |                              |                         |                           |                         |            |       |            |
|           | 16      |                         |                             |                              |                         |                           |                         |            |       |            |

Adverse events following vaccinations were observed for 7 days. \*<sub>1</sub> Red patch at the vaccination site. \*<sub>2</sub> Induration by vaccination. \*<sub>3</sub> Fever above 40.5 °C. \*<sub>4</sub> Clinical signs of anorexia or depression. “–” shows no clinical sign and “+” shows adverse event.

**Table S2.** Detection of *E. rhusiopathiae* cells in organs of pigs.

| Group No. | Pig No. | Immunization            | Challenge Strain              | From Organs * <sub>1</sub> |       |        |        |      |                |                        |
|-----------|---------|-------------------------|-------------------------------|----------------------------|-------|--------|--------|------|----------------|------------------------|
|           |         |                         |                               | Heart                      | Liver | Spleen | Kidney | Lung | Synovial Fluid | Mandibular Ltmph Nodes |
| 1         | 1       | Vaccinated<br>(SER-ME)  | Fujisawa<br>(reference)       | –                          | –     | –      | –      | –    | –              | –                      |
|           | 2       |                         |                               | –                          | –     | –      | –      | –    | –              | –                      |
|           | 3       |                         |                               | –                          | –     | –      | –      | –    | –              | –                      |
|           | 4       |                         |                               | –                          | –     | –      | –      | –    | –              | –                      |
| 2         | 5       | Unvaccinated<br>control | Fujisawa<br>(reference)       | +                          | +     | +      | +      | +    | +              | +                      |
|           | 6       |                         |                               | +                          | +     | +      | +      | +    | +              | +                      |
|           | 7       |                         |                               | +                          | +     | +      | +      | +    | +              | +                      |
|           | 8       |                         |                               | +                          | +     | +      | +      | +    | +              | –                      |
| 3         | 9       | Vaccinated<br>(SER-ME)  | 2012<br>Miyazaki<br>(variant) | –                          | –     | –      | –      | –    | –              | –                      |
|           | 10      |                         |                               | –                          | –     | –      | –      | –    | –              | –                      |
|           | 11      |                         |                               | –                          | –     | –      | –      | –    | –              | –                      |
|           | 12      |                         |                               | –                          | –     | –      | –      | –    | –              | –                      |
| 4         | 13      | Unvaccinated<br>control | 2012<br>Miyazaki<br>(variant) | +                          | +     | +      | +      | +    | +              | +                      |
|           | 14      |                         |                               | +                          | +     | +      | +      | +    | +              | +                      |
|           | 15      |                         |                               | +                          | +     | +      | +      | +    | +              | +                      |
|           | 16      |                         |                               | +                          | +     | +      | +      | +    | +              | +                      |

\*<sub>1</sub> *E. rhusiopathiae* colonies from organ samples collected after the pigs’ death including humane endpoint are shown. “–” shows no colony and “+” shows colonies on the agar plate.
